# Supplementary material for: Financial Reasons for Working beyond the Statutory Retirement Age: Risk Factors and Associations with Health in Late Life
Source: MDPI journal article supplement (doi:10.3390/ijerph191710505), 2022-08-23
Supplement: s1 [file s1]

## Supplementary Materials

**Table S1.** Multinomial logistic regression on reason for working beyond the SRA.

|                                              | Reason for working beyond the SRA (ref = financial) |                 |                            |                 |                 |                 |
|----------------------------------------------|-----------------------------------------------------|-----------------|----------------------------|-----------------|-----------------|-----------------|
|                                              | Offer/request from<br>employer                      |                 | Self-employment/new<br>job |                 | Personal/social |                 |
|                                              | Coef.                                               | SE <sup>a</sup> | Coef.                      | SE <sup>a</sup> | Coef.           | SE <sup>a</sup> |
| Gender (ref = women)                         |                                                     |                 |                            |                 |                 |                 |
| Men                                          | 0.784                                               | (0.960)         | 0.311                      | (1.008)         | -0.290          | (0.857)         |
| Education level (ref = secondary education)  |                                                     |                 |                            |                 |                 |                 |
| No or compulsory education                   | -16.17***                                           | (1.298)         | -16.29***                  | (1.612)         | -0.987          | (1.077)         |
| Tertiary education                           | -0.058                                              | (0.901)         | -2.017*                    | (0.935)         | -0.054          | (0.859)         |
| Occupational groups (ref = lower non-manual) |                                                     |                 |                            |                 |                 |                 |
| Higher non-manual                            | -1.156                                              | (1.003)         | 2.307                      | (1.244)         | -0.559          | (0.897)         |
| Manual                                       | 1.755                                               | (1.536)         | 2.812                      | (1.815)         | 0.455           | (1.278)         |
| Income (ref = 6,000-10,000 CHF)              |                                                     |                 |                            |                 |                 |                 |
| < 6,000 CHF                                  | -1.784                                              | (1.180)         | -2.781*                    | (1.110)         | -2.254*         | (0.949)         |
| > 10,000 CHF                                 | -0.711                                              | (1.305)         | -0.327                     | (1.335)         | -0.841          | (1.130)         |
| Age                                          | -3.208*                                             | (1.537)         | -2.509                     | (1.595)         | -0.415          | (1.294)         |
| Age <sup>2</sup>                             | 0.004*                                              | (0.002)         | 0.004*                     | (0.002)         | 0.002           | (0.002)         |
| Constant                                     | -13.16                                              | (7.185)         | -16.71*                    | (7.753)         | -6.884          | (6.142)         |
| N                                            |                                                     |                 | 82                         |                 |                 |                 |
| Pseudo R-square                              |                                                     |                 | 0.232                      |                 |                 |                 |

Ref = Reference category, CHF = Swiss francs, SE = Standard errors

<sup>a</sup> Robust standard errors were used, \*\*\*  $p < 0.001$ , \*  $p < 0.05$
